# Supplementary material
Source: PubMed Central journal article supplement (PMC3657777)
Supplement: 1222079110_pnas.201222079SI.pdf [file 1222079110_pnas.201222079SI.pdf]

# Supporting Information

Acquati et al. 10.1073/pnas.1222079110

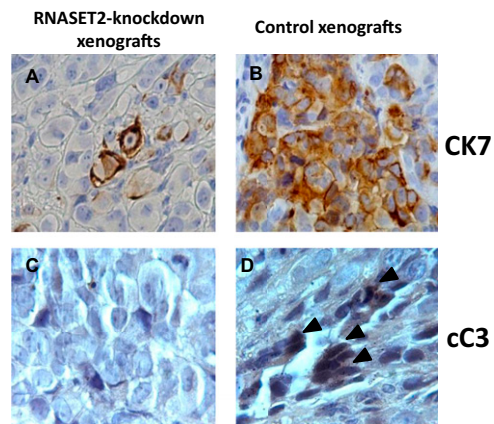

**Fig. S1.** Parental and *RNASET2*-silenced OVCAR3-derived tumor sections were stained with cytokeratin 7 (*A* and *B*) and activated caspase 3 (*C* and *D*) as markers for cell differentiation and apoptosis, respectively.



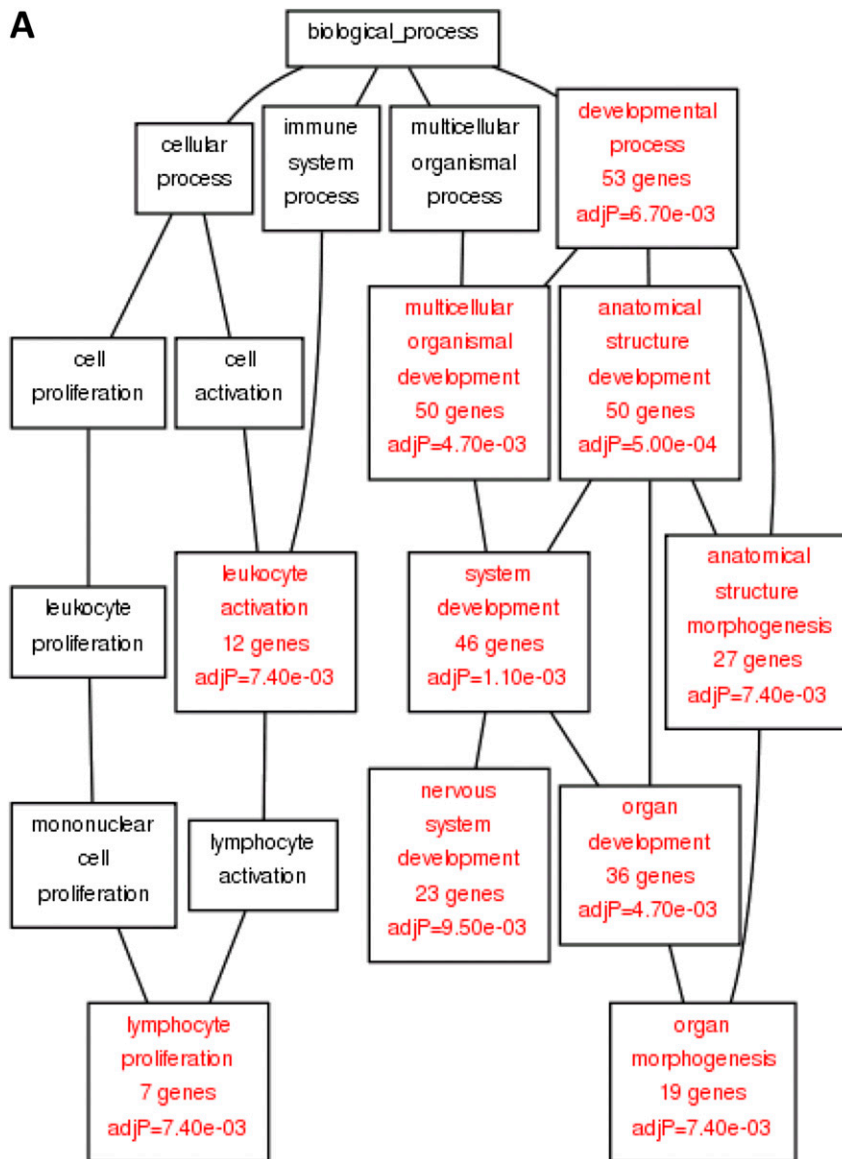

Fig. S3. (Continued)

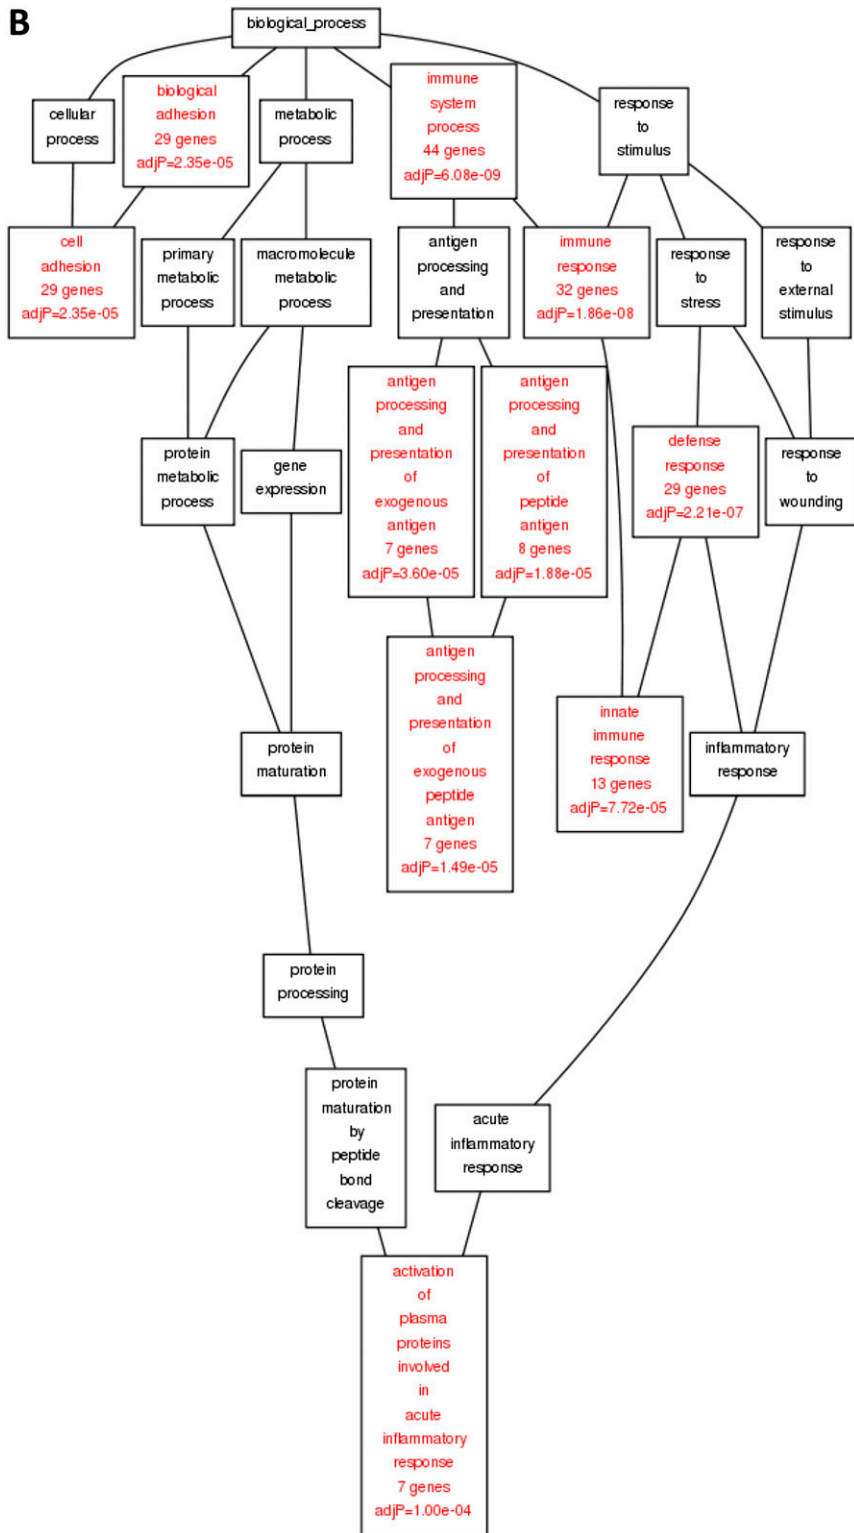

**Fig. S3.** Gene Ontology analysis results for the enriched “biological process” entries for human (A) and murine (B) genes following analysis of OVCAR3 xenograft gene expression profile obtained by microarray hybridization.

**Table S1. Histological and IHC data from RNASET2-silenced and control tumor xenografts**

| OVCAR3 clone          | Growth pattern*     | Cell morphology | Mitotic index <sup>†</sup> | Ki-67 | CK7 <sup>‡</sup> | Apoptosis <sup>§</sup> | CD45 <sup>§</sup> | CD68 <sup>§</sup> | NOS-1 <sup>§</sup> | Dectin 1 <sup>§</sup> | RNASET2 expression |
|-----------------------|---------------------|-----------------|----------------------------|-------|------------------|------------------------|-------------------|-------------------|--------------------|-----------------------|--------------------|
| Sh RNASET2 clone 1    | Diffuse/solid nests | L, P            | 28                         | 40    | —                | 1+                     | 1+                | 1+                | 1+                 | +/-                   | Negative           |
| Sh RNASET2 clone 7    | Diffuse/solid nests | L, P            | 26                         | 35    | +                | 2+                     | 1/2+              | —                 | +/-                | 1+                    | Negative           |
| Sh RNASET2 clone 7    | Diffuse/solid nests | L, P            | 35                         | 50    | +                | 1+                     | 1+                | 1+                | +/-                | 1/2+                  | Negative           |
| Sh RNASET2 clone 11   | Diffuse             | L, P            | 32                         | 45    | +                | 2+                     | 2+                | 1+                | —                  | 2+                    | Negative           |
| Sh scrambled clone 5  | Nests/micronests    | L, P, C         | 23                         | 30    | +                | 3+                     | 2+                | 2+                | 2+                 | 1/2+                  | Positive           |
| Sh scrambled clone 5  | Nests               | L, P, C         | 14                         | 25    | ++               | 2+                     | 2/3+              | 1/2+              | 2+                 | 2/3+                  | Positive           |
| Sh scrambled clone 11 | Nests/micronests    | L, A            | 16                         | 40    | +++              | 2+                     | 3+                | 2+                | 1/2+               | 2+                    | Positive           |
| Sh scrambled clone 11 | Solid nests         | L, C            | 25                         | 25    | ++               | 2+                     | 2+                | 2+                | 3+                 | 2/3+                  | Positive           |
| Sh scrambled clone 3  | Solid nests         | L, A, C         | 22                         | 30    | ++               | 3+                     | 3+                | 2+                | 3+                 | 2+                    | Positive           |

A, angulated; C, clear; IHC, immunohistochemistry; L, large; P, polygonal.

\*Indicates tumor structure, namely diffuse and/or forming nests/micronests. When both patterns were present, the former is the prevailing type.

<sup>†</sup>Number of mitotic figures 10× high-power fields.

<sup>‡</sup>—, absent; +, few cells stained; ++, moderate number of cells stained; +++, many cells stained.

<sup>§</sup>—, absent; 1+, scant; 2+, moderate; 3+, abundant.

## Other Supporting Information Files

[Dataset S1 \(XLS\)](#)

[Dataset S2 \(XLS\)](#)

[Dataset S3 \(XLS\)](#)

[Dataset S4 \(XLS\)](#)

[Dataset S5 \(XLS\)](#)
